# Supplementary material for: A BODIPY based indicator for fluorogenic detection of salicylaldehyde with off–on emission
Source: Royal Society of Chemistry journal article supplement (doi:10.1039/c4ay01011f), 2014-01-01
Supplement: c4ay01011f1.pdf [file c4ay01011f1.pdf]

Supporting information

## A BODIPY based indicator for Fluorogenic detection of salicylaldehyde with OFF-ON emission

Qian Li, Jian Xu, Ying Yue, Yuan Liao and Shijun Shao\*

*Key Laboratory of Chemistry of Northwestern Plant Resources and Key Laboratory for Natural Medicine of Gansu Province, Lanzhou Institute of Chemical Physics, Chinese Academy of Sciences, Lanzhou 730000, P. R. China.*

Email: sjshao@licp.cas.cn.

### Experimental

#### Apparatus and materials

<sup>1</sup>H NMR spectra were recorded in DMSO-d<sub>6</sub> solution on the Inova 400 MHz instruments, and spectral data were reported in ppm relative to tetramethylsilane (TMS) as internal standard. HR MS were carried out on QToF-Micro YA 263 instruments. And fluorescent spectra were recorded on a Perkin Elmer LS55 Fluorescence Spectrophotometer.

#### Synthesis

##### Synthesis of compound 2

To a solution of 2,4-dimethylpyrrole (2 equiv.) in absolute CH<sub>2</sub>Cl<sub>2</sub> solution was added the 3,5-dinitrobenzoyl chloride (1 equiv.). The solution was stirred at room temperature for 24 hours, the color changing slowly from pale brown to deep red. Et<sub>3</sub>N (6 equiv.) was then added, followed by a subsequent addition of BF<sub>3</sub>-Et<sub>2</sub>O (8 equiv.). The mixture was stirred for another 6 hours at room temperature. The reaction was stopped by the addition of saturated aqueous NaHCO<sub>3</sub> (100ml), and then was washed 3 times with saturated aqueous NaHCO<sub>3</sub>. The organic layer was then dried over MgSO<sub>4</sub>, filtered and the solvent removed. Chromatography on silica gel (CH<sub>2</sub>Cl<sub>2</sub>/cyclohexane, 1:1 as eluent) gave the pure compound 2.

##### Synthesis of compound 1

Compound 2 (0.7 g, 1.9 mmol) was dissolved in 50 mL of absolute THF and 50 mL of absolute MeOH. After purged with N<sub>2</sub>, 5%Pd/C(1.0g) and 2.0 ml hydrazine were added. The

solution was stirred at reflux under N<sub>2</sub> for 5 hours. When TLC monitoring (silica gel; CH<sub>2</sub>Cl<sub>2</sub>) showed complete consumption of 2, the reaction mixture was filtered, and evaporated. The compound was purified by silica gel column chromatography (CH<sub>2</sub>Cl<sub>2</sub> and CH<sub>2</sub>Cl<sub>2</sub>/MeOH as eluent) to give a red solid (83%). Recrystallized from CH<sub>2</sub>Cl<sub>2</sub>/n-hexane to afford orange crystals 1.

<sup>1</sup>H NMR (DMSO-d<sub>6</sub>, 400 MHz): 6.13-6.18 (m, 2H), 5.89 (s, 1H), 5.67-5.68 (m, 2H), 4.95 (s, 4H), 2.41-2.48 (m, 6H), 1.68 (s, 6H).

HR-MS C<sub>19</sub>H<sub>21</sub>BF<sub>2</sub>N<sub>4</sub>, Anal. Calc. M+Na = 377.1723; Found 377.1734.

Which was consistent with the reported data.

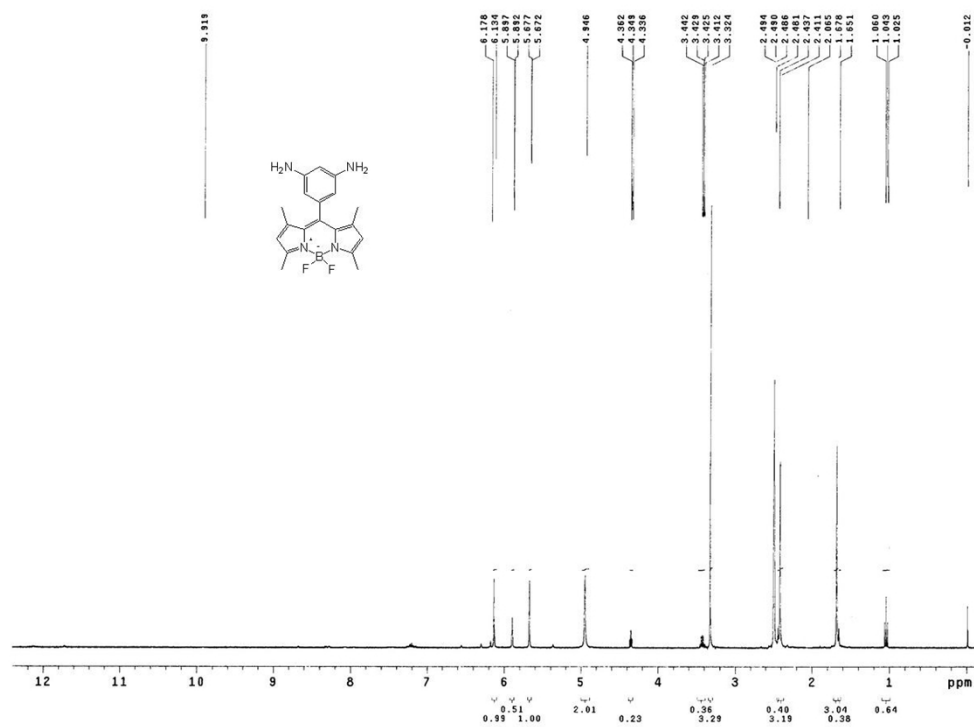

Fig. S1 <sup>1</sup>H NMR Spectra of probe 1.

## Generic Display Report

### Analysis Info

Analysis Name D:\Data\user\liqian 5-22-1.d  
Method tune\_wide.m  
Sample Name liqian 5-22-1  
Comment

Acquisition Date 5/22/2014 10:54:40 AM

Operator BDAL@CN  
Instrument micrOTOF-Q II

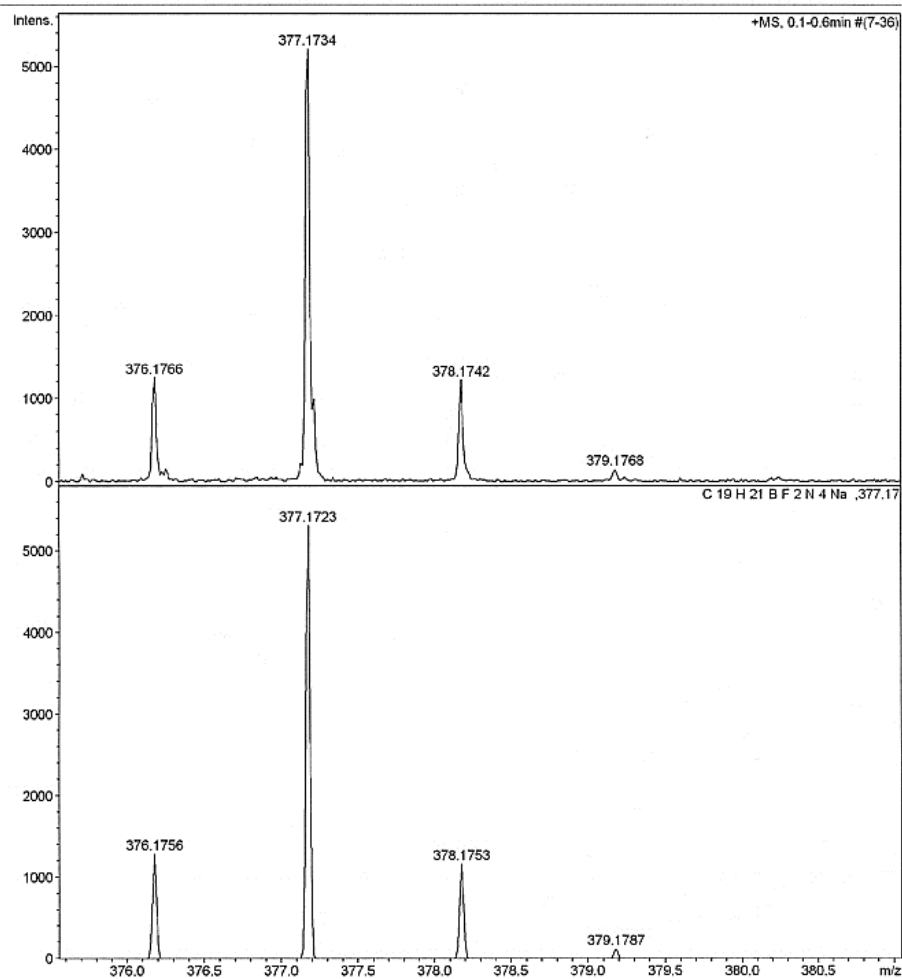

Fig. S2 HR-MS Spectra of probe 1.

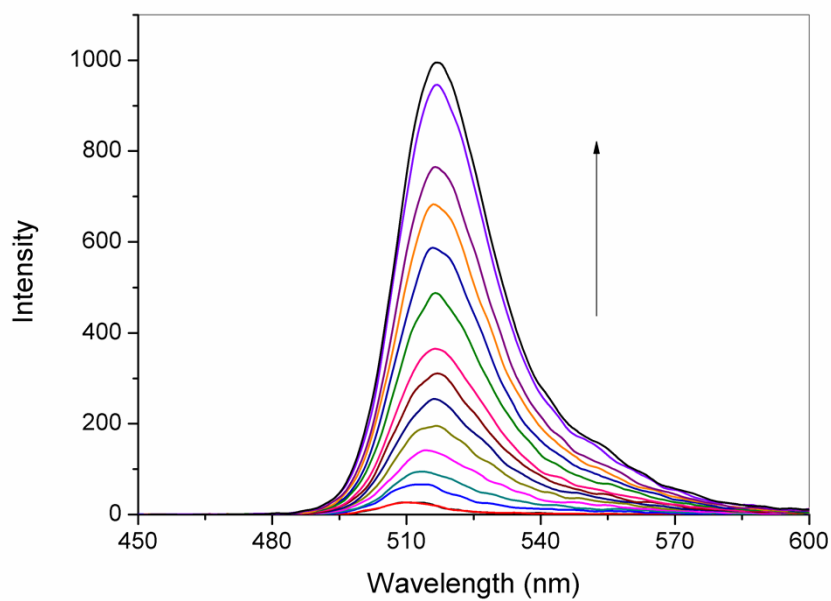

**Fig. S3** Fluorescence emission spectra of Probe **1** (5  $\mu\text{M}$ ) in EtOH-H<sub>2</sub>O solution in the presence of salicylaldehyde (0-15 mM). The inset shows the titration curve of salicylaldehyde with Probe **1** by fluorescence emission intensity at 522 nm.

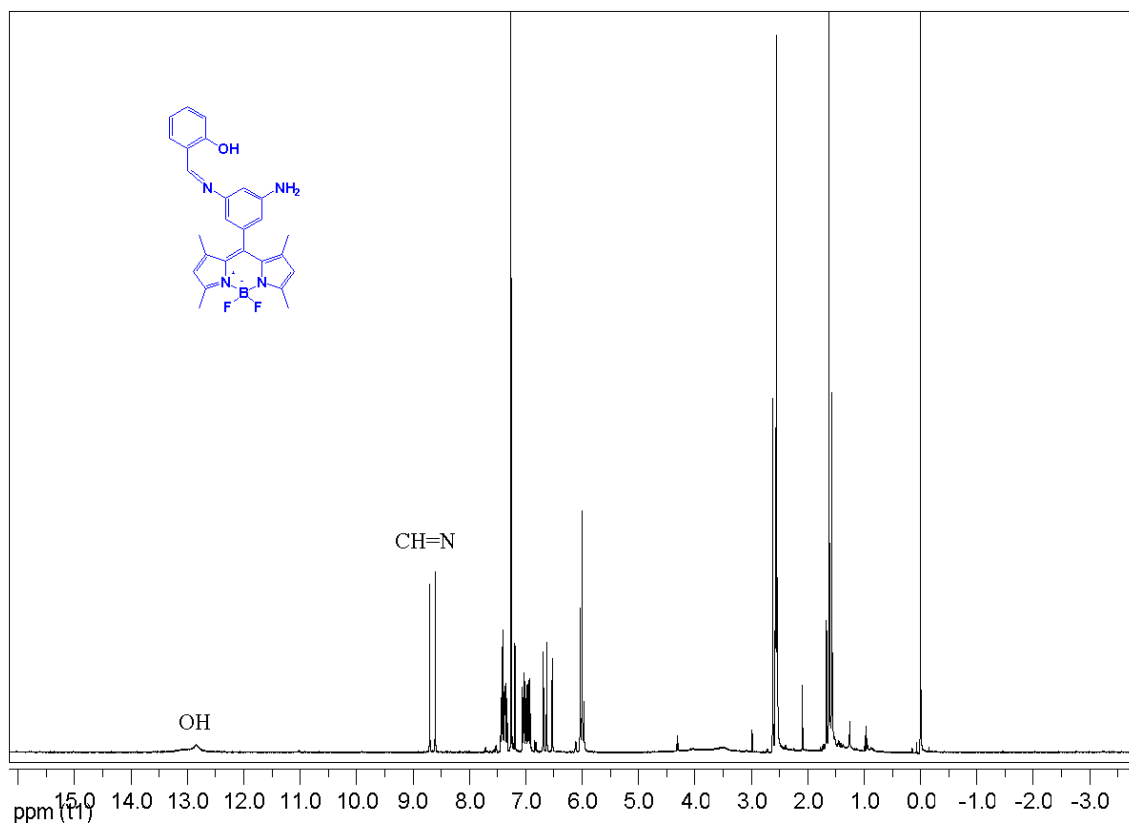

**Fig. S4** <sup>1</sup>H NMR Spectra of reaction product P1 of probe **1** with **salicylaldehyde**

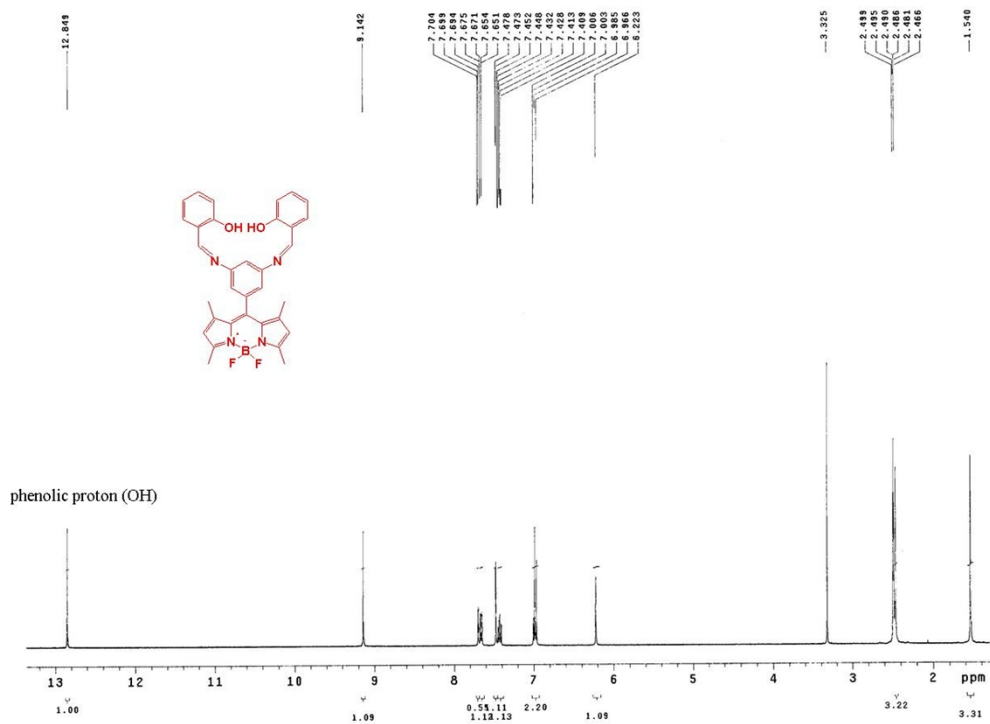

Fig. S5 <sup>1</sup>H NMR Spectra of reaction product P2 of probe 1 with salicylaldehyde
